# Supplementary material for: Genetic diversity of the Plasmodium falciparum GTP-cyclohydrolase 1, dihydrofolate reductase and dihydropteroate synthetase genes reveals new insights into sulfadoxine-pyrimethamine antimalarial drug resistance
Source: PubMed Central journal article supplement (PMC7774857; doi:10.1371/journal.pgen.1009268), 2020-12-31

S1 Fig. Histogram of the start and end positions for the three types of *pfgch1* promoter amplifications identified (KE01, ML01, KE01/ML01).

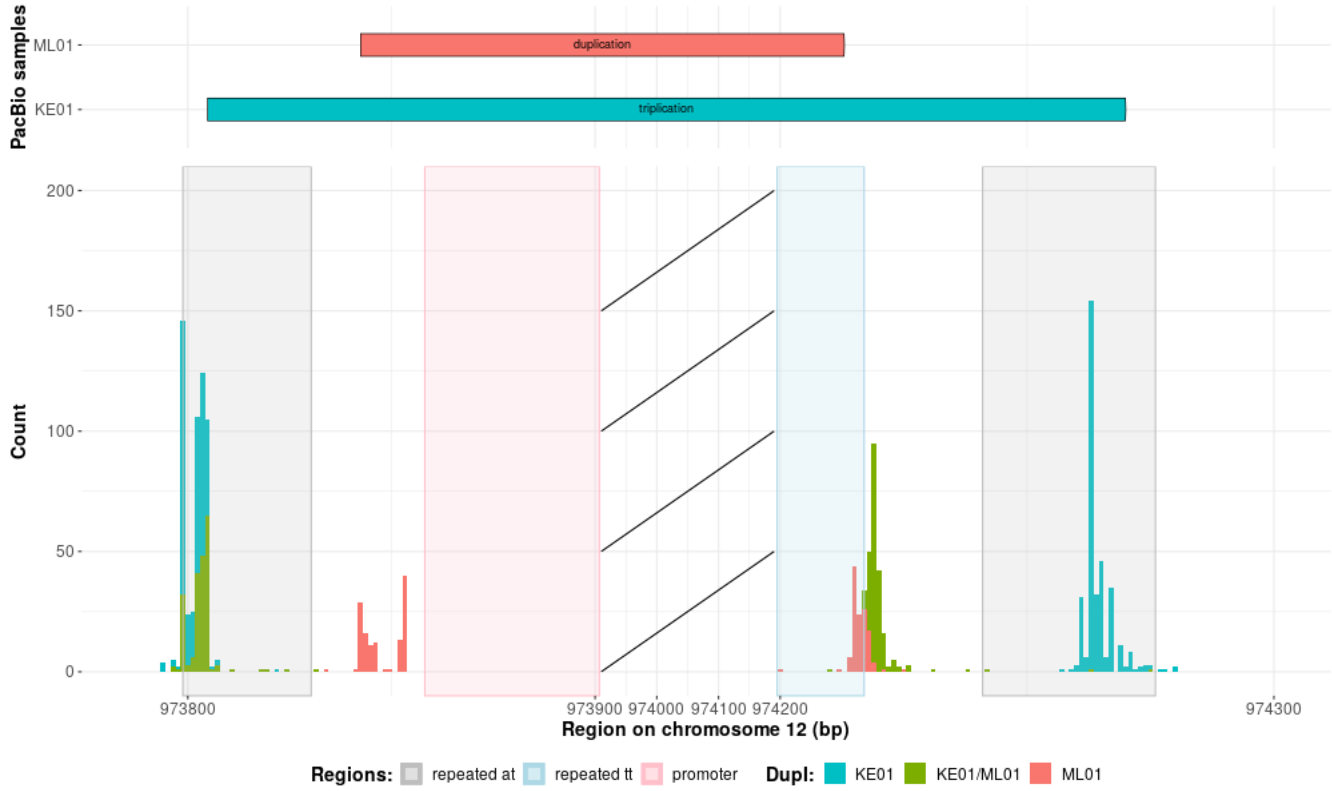

Supplement: pgen.1009268.s001.pdf [file pgen.1009268.s001.pdf]
