# Supplementary material for: Genetic diversity of the Plasmodium falciparum GTP-cyclohydrolase 1, dihydrofolate reductase and dihydropteroate synthetase genes reveals new insights into sulfadoxine-pyrimethamine antimalarial drug resistance
Source: PubMed Central journal article supplement (PMC7774857; doi:10.1371/journal.pgen.1009268), 2020-12-31
Supplement: pgen.1009268.s002.pdf [file pgen.1009268.s002.pdf]

**S2 Fig. The proportion of *pfgh1* amplifications by the number *pdfhfr* and *pdfhps* mutations\*. A. Africa, B. South(east) Asia**

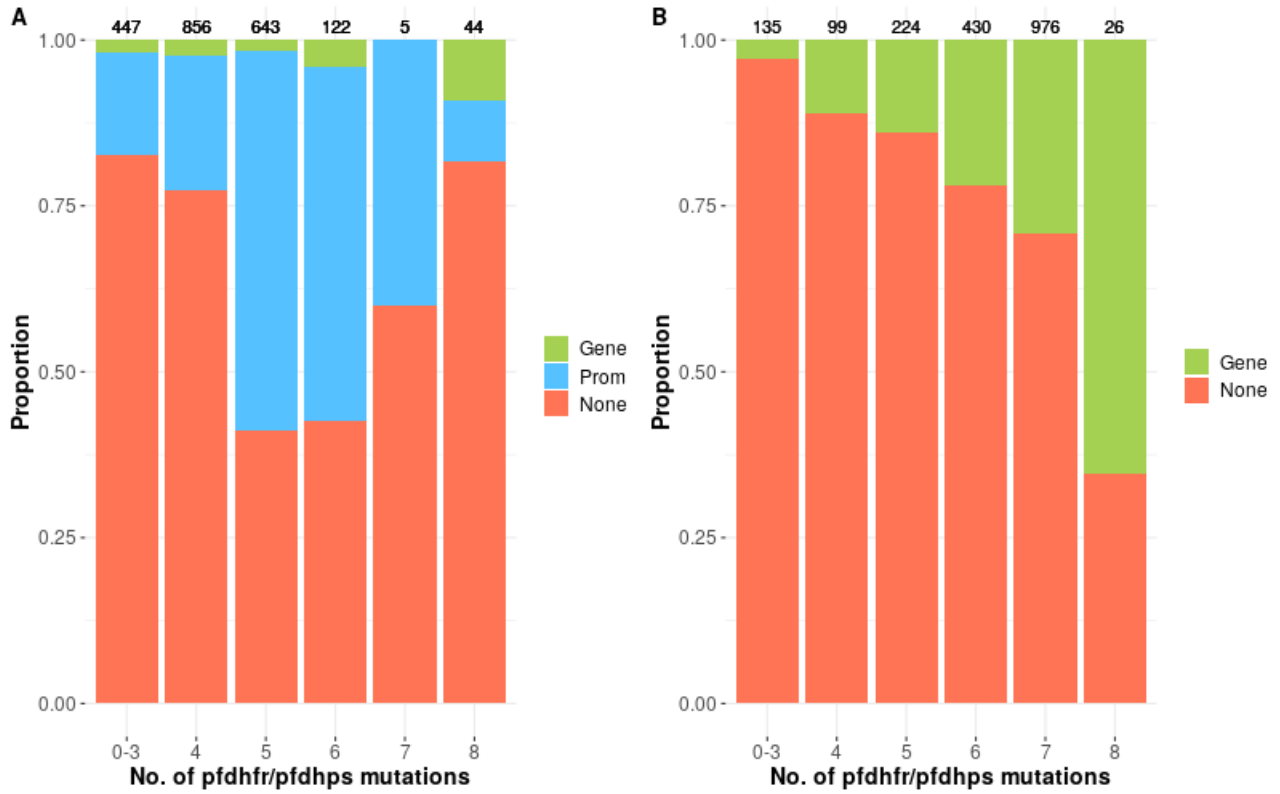

\* based on *pdfhfr* (N51I, C59R, S108N and I164L) and *pdfhps* (S436A, A437G, K540E/K540N, A581G and S613A)
