# Supplementary material for: Genetic diversity of the Plasmodium falciparum GTP-cyclohydrolase 1, dihydrofolate reductase and dihydropteroate synthetase genes reveals new insights into sulfadoxine-pyrimethamine antimalarial drug resistance
Source: PubMed Central journal article supplement (PMC7774857; doi:10.1371/journal.pgen.1009268), 2020-12-31

**S3 Fig.** Number of *pdfhfr/pdfhps* mutations and *pfpch1* promoter amplifications over time for five African countries with more than one year of sampling.

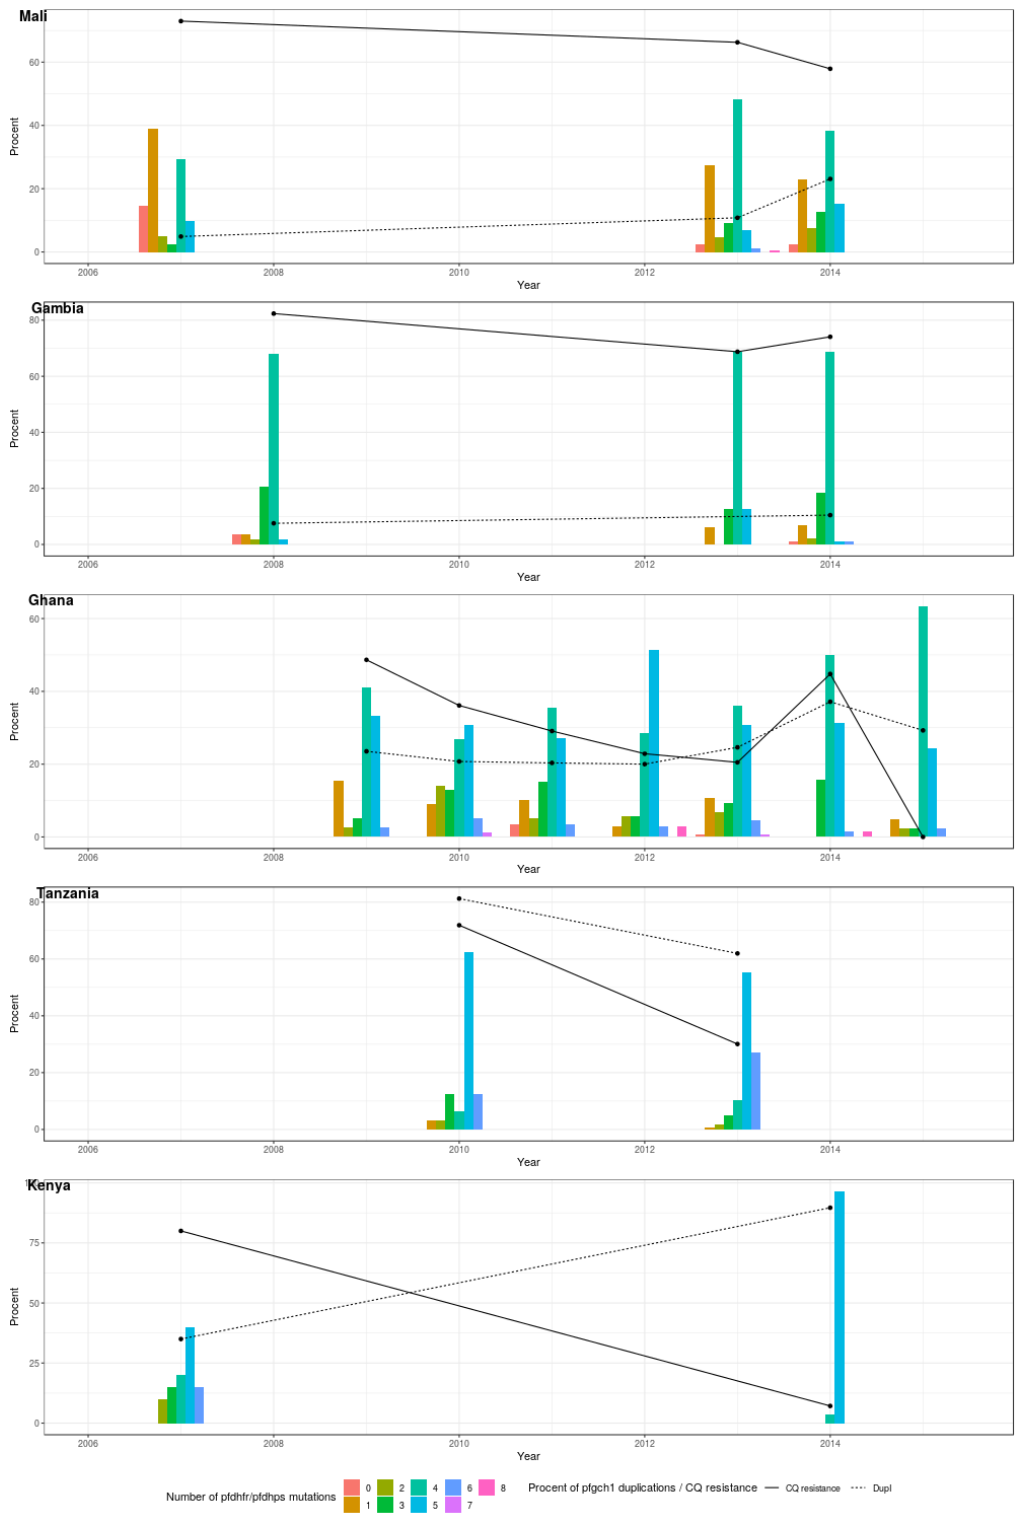

Supplement: pgen.1009268.s003.pdf [file pgen.1009268.s003.pdf]
