# Supplementary material for: Genetic diversity of the Plasmodium falciparum GTP-cyclohydrolase 1, dihydrofolate reductase and dihydropteroate synthetase genes reveals new insights into sulfadoxine-pyrimethamine antimalarial drug resistance
Source: PubMed Central journal article supplement (PMC7774857; doi:10.1371/journal.pgen.1009268), 2020-12-31
Supplement: pgen.1009268.s004.pdf [file pgen.1009268.s004.pdf]

**S1 Table. The geographical distribution of common *pfdhfr* and *pfdhps* mutations in 4,134 *P. falciparum* isolates (%).**

| Region           | n    | <i>pfdhfr</i> |             |             |             |             | <i>pfdhps</i> |             |       |             |             |       |             |       |
|------------------|------|---------------|-------------|-------------|-------------|-------------|---------------|-------------|-------|-------------|-------------|-------|-------------|-------|
|                  |      | N51I          | C59R        | S108N       | I164L       | S306F       | I431V         | S436A       | S436F | A437G       | K540E       | K540N | A581G       | A613S |
| West Africa      | 1254 | <b>74.1</b>   | <b>80.1</b> | <b>81.9</b> | -           | -           | 2.1           | <b>50.3</b> | 0.8   | <b>68.8</b> | 1.0         | -     | 1.9         | 8.0   |
| Central Africa   | 337  | <b>98.2</b>   | <b>86.4</b> | <b>99.4</b> | -           | -           | 11.0          | 22.6        | -     | <b>93.5</b> | 4.7         | -     | 8.9         | 8.9   |
| East Africa      | 270  | <b>95.2</b>   | <b>90.4</b> | <b>98.5</b> | 1.5         | -           | -             | 3.7         | 1.5   | <b>88.5</b> | <b>87.4</b> | -     | 21.1        | 0.4   |
| Southern Africa  | 234  | <b>96.6</b>   | <b>97.9</b> | <b>98.3</b> | -           | -           | -             | 0.4         | -     | <b>97.9</b> | <b>92.3</b> | -     | 2.1         | -     |
| Horn of Africa   | 22   | <b>100</b>    | <b>90.9</b> | <b>100</b>  | -           | -           | -             | -           | -     | <b>95.5</b> | <b>95.5</b> | -     | -           | -     |
| South(east) Asia | 1890 | <b>89.6</b>   | <b>99.6</b> | <b>99.6</b> | <b>60.2</b> | -           | -             | 29.7        | 1.7   | <b>92.9</b> | <b>61.9</b> | 18.8  | <b>52.3</b> | 1.5   |
| Oceania          | 95   | -             | <b>100</b>  | <b>100</b>  | -           | <b>84.2</b> | -             | -           | -     | 42.1        | 32.6        | -     | -           | -     |
| South America    | 32   | 28.1          | -           | <b>93.8</b> | 6.3         | -           | -             | -           | -     | 28.1        | 9.4         | -     | 21.9        | -     |

Frequencies greater than 50% are bolded
