# Supplementary material for: Genetic diversity of the Plasmodium falciparum GTP-cyclohydrolase 1, dihydrofolate reductase and dihydropteroate synthetase genes reveals new insights into sulfadoxine-pyrimethamine antimalarial drug resistance
Source: PubMed Central journal article supplement (PMC7774857; doi:10.1371/journal.pgen.1009268), 2020-12-31
Supplement: pgen.1009268.s005.pdf [file pgen.1009268.s005.pdf]

**S2 Table. Frequency (%) of *pfdhfr*/*pfdhps* genotypes by country.**

| Genotypes *  | Mauritania  | Mali        | Senegal     | Gambia      | Guinea      | Burkina Faso | Ivory Coast | Ghana       | Benin       | Nigeria     | Cameroon    | DRC         | Uganda      | Kenya       | Tanzania    | Malawi      | Madagascar  | Ethiopia    |
|--------------|-------------|-------------|-------------|-------------|-------------|--------------|-------------|-------------|-------------|-------------|-------------|-------------|-------------|-------------|-------------|-------------|-------------|-------------|
| NCIS-ISAKAA  | 5.5         | 4.3         | 1.3         | 1.8         | -           | -            | 4.3         | 0.6         | -           | -           | 1.3         | -           | <b>25.0</b> | -           | -           | -           | <b>16.7</b> | -           |
| NCIS-ISGKAA  | 3.6         | <b>10.5</b> | -           | 3.0         | 3.0         | -            | 6.5         | 6.2         | -           | -           | -           | -           | -           | -           | -           | -           | 5.6         | -           |
| NCIS-IAAKAA  | <b>12.7</b> | <b>17.8</b> | 2.6         | 2.4         | 4.0         | <b>18.2</b>  | 8.7         | 1.5         | -           | -           | -           | -           | -           | -           | 0.9         | -           | -           | -           |
| NCIS-IAGKAA  | -           | 3.9         | 1.3         | 0.6         | 3.0         | <b>18.2</b>  | 6.5         | 4.9         | -           | -           | -           | -           | -           | -           | -           | -           | -           | -           |
| NCIS-ISAKAA  | -           | -           | -           | -           | -           | -            | -           | -           | -           | -           | -           | -           | -           | -           | -           | -           | -           | -           |
| NRNIS-ISAKAA | -           | 0.8         | -           | -           | -           | -            | -           | -           | -           | -           | -           | -           | -           | -           | 0.5         | -           | -           | -           |
| NRNIS-ISGKAA | 1.8         | 1.2         | -           | 1.2         | 3.0         | -            | -           | 6.2         | 1.6         | -           | -           | 0.6         | -           | -           | -           | -           | -           | -           |
| NRNIS-ISGEAA | -           | -           | -           | -           | -           | -            | -           | 0.2         | -           | -           | -           | -           | -           | 2.0         | 2.3         | 1.9         | -           | -           |
| NRNIS-IAAKAA | 1.8         | 1.9         | -           | -           | 1.0         | -            | -           | 1.9         | -           | -           | -           | -           | -           | -           | 0.5         | -           | -           | -           |
| NRNIS-IAGKAA | -           | -           | -           | -           | 1.0         | -            | 6.5         | 4.3         | -           | -           | -           | 0.6         | -           | -           | -           | -           | -           | -           |
| NRNIS-IAGEAA | -           | -           | -           | -           | -           | -            | -           | -           | -           | -           | -           | -           | -           | -           | -           | -           | -           | -           |
| NRNIF-ISAKAA | -           | -           | -           | -           | -           | -            | -           | -           | -           | -           | -           | -           | -           | -           | -           | -           | -           | -           |
| NRNIF-ISGKAA | -           | -           | -           | -           | -           | -            | -           | -           | -           | -           | -           | -           | -           | -           | -           | -           | -           | -           |
| NRNIF-ISGEAA | -           | -           | -           | -           | -           | -            | -           | -           | -           | -           | -           | -           | -           | -           | -           | -           | -           | -           |
| NRNLS-ISGEGA | -           | -           | -           | -           | -           | -            | -           | -           | -           | -           | -           | -           | -           | -           | -           | -           | -           | -           |
| NRNLS-IAGEAA | -           | -           | -           | -           | -           | -            | -           | -           | -           | -           | -           | -           | -           | -           | -           | -           | -           | -           |
| ICNIS-ISAKAA | -           | -           | -           | -           | -           | -            | -           | -           | -           | -           | -           | -           | -           | 4.0         | 0.9         | -           | -           | -           |
| ICNIS-ISGKAA | 1.8         | -           | -           | 1.8         | -           | -            | -           | 1.1         | -           | -           | -           | <b>18.4</b> | -           | -           | -           | -           | -           | -           |
| ICNIS-ISGEAA | -           | -           | -           | -           | -           | -            | -           | -           | -           | -           | -           | -           | -           | 8.0         | 4.6         | 0.5         | -           | 9.1         |
| ICNIS-ISGEGA | -           | -           | -           | -           | -           | -            | -           | -           | -           | -           | -           | -           | -           | 1.1         | 0.9         | -           | -           | -           |
| IRNIS-ISAKAA | 3.6         | 4.7         | <b>32.9</b> | <b>14.4</b> | 4.0         | 9.1          | 2.2         | 0.4         | -           | -           | 0.6         | 3.4         | -           | 6.0         | 5.1         | -           | <b>11.1</b> | 4.5         |
| IRNIS-ISGKAA | <b>20.0</b> | <b>16.3</b> | <b>34.2</b> | <b>55.1</b> | <b>36.4</b> | 9.1          | <b>19.6</b> | <b>24.8</b> | <b>57.4</b> | <b>69.2</b> | <b>59.5</b> | <b>59.2</b> | -           | -           | -           | -           | <b>44.4</b> | -           |
| IRNIS-ISGEGA | -           | -           | -           | -           | -           | -            | -           | -           | -           | -           | -           | -           | -           | -           | -           | -           | <b>22.2</b> | -           |
| IRNIS-ISGNGA | -           | -           | -           | -           | -           | -            | -           | -           | -           | -           | -           | -           | -           | -           | -           | -           | -           | -           |
| IRNIS-ISGEAA | 3.6         | -           | -           | 0.6         | 4.0         | -            | -           | 0.9         | -           | -           | -           | 3.4         | <b>75.0</b> | <b>72.0</b> | <b>54.6</b> | <b>96.7</b> | 0.0         | <b>86.4</b> |
| IRNIS-ISGEGA | -           | -           | -           | -           | -           | -            | -           | -           | -           | -           | -           | 2.2         | -           | -           | <b>25.0</b> | 0.5         | -           | -           |
| IRNIS-IAAKAA | <b>30.9</b> | <b>27.5</b> | <b>25.0</b> | <b>14.4</b> | <b>12.1</b> | 9.1          | 2.2         | 7.9         | 1.6         | -           | 5.7         | 1.1         | -           | -           | 2.8         | -           | -           | -           |
| IRNIS-IAGKAA | 7.3         | 8.5         | -           | 2.4         | <b>16.2</b> | <b>18.2</b>  | <b>23.9</b> | <b>28.8</b> | 6.6         | 7.7         | 4.4         | 5.6         | -           | -           | -           | -           | -           | -           |
| IRNIS-IAGKAS | 5.5         | 0.8         | -           | 0.6         | 8.1         | 0.0          | 6.5         | 3.6         | 4.9         | 7.7         | 3.8         | -           | -           | -           | -           | -           | -           | -           |
| IRNIS-IAGEAA | -           | -           | -           | -           | -           | -            | -           | -           | -           | -           | 0.0         | -           | -           | -           | -           | 0.5         | -           | -           |
| IRNIS-VAGKAA | -           | -           | -           | -           | -           | -            | -           | -           | -           | -           | 8.9         | -           | -           | -           | -           | -           | -           | -           |
| IRNIS-VAGKGS | -           | 0.4         | -           | -           | -           | -            | 4.3         | 0.4         | <b>26.2</b> | -           | <b>14.6</b> | -           | -           | -           | -           | -           | -           | -           |
| IRNLS-ISGNGA | -           | -           | -           | -           | -           | -            | -           | -           | -           | -           | -           | -           | -           | -           | -           | -           | -           | -           |
| IRNLS-ISGEAA | -           | -           | -           | -           | -           | -            | -           | -           | -           | -           | -           | -           | -           | -           | -           | -           | -           | -           |
| IRNLS-ISGEGA | -           | -           | -           | -           | -           | -            | -           | -           | -           | -           | -           | -           | -           | -           | -           | -           | -           | -           |
| IRNLS-IFGKAA | -           | -           | -           | -           | -           | -            | -           | -           | -           | -           | -           | -           | -           | 6.0         | -           | -           | -           | -           |
| IRNLS-IFGEAS | -           | -           | -           | -           | -           | -            | -           | -           | -           | -           | -           | -           | -           | -           | -           | -           | -           | -           |
| IRNLS-IAGEAA | -           | -           | -           | -           | -           | -            | -           | -           | -           | -           | -           | -           | -           | -           | -           | -           | -           | -           |

WT = wild-type; DRC = Democratic Republic of Congo; PNG = Papua New Guinea; \* based on *pfhfr* (N5II, C59R, S108N and I164L) and *pfdhps* (S436A/S436F, A437G, K540E/K540N, A581G and S613A); Mozambique (N=1; NRNIF-ISGEAA); Indonesia (N=1, IRNIS-ISGEAA); frequencies greater than 10% are bolded

| Genotypes *  | Bangladesh | Myanmar | Thailand | Laos | Cambodia | Vietnam | PNG  | Colombia | Peru |
|--------------|------------|---------|----------|------|----------|---------|------|----------|------|
| NCSIS-ISAKAA | -          | -       | -        | 5.2  | 0.4      | -       | -    | 6.7      | 5.9  |
| NCSIS-ISGKAA | -          | -       | -        | -    | -        | -       | -    | -        | -    |
| NCSIS-IAAKAA | -          | -       | -        | -    | -        | -       | -    | -        | -    |
| NCSIS-IAGKAA | -          | -       | -        | -    | -        | -       | -    | 60.0     | 52.9 |
| NCNIS-ISAKAA | -          | -       | 0.1      | 19.6 | 1.1      | -       | 9.6  | -        | -    |
| NRNIS-ISAKAA | 2.9        | -       | -        | 7.2  | 1.1      | -       | 2.1  | -        | -    |
| NRNIS-ISGKAA | 8.8        | -       | -        | -    | 0.3      | -       | 4.3  | -        | -    |
| NRNIS-ISGEAA | -          | -       | -        | -    | -        | -       | -    | -        | -    |
| NRNIS-IAAKAA | -          | -       | -        | 1.0  | 1.5      | 0.7     | -    | -        | -    |
| NRNIS-IAGKAA | -          | -       | -        | 6.2  | 0.3      | -       | -    | -        | -    |
| NRNIS-IAGEAA | 17.6       | 2.3     | 1.9      | -    | -        | -       | -    | -        | -    |
| NRNIF-ISAKAA | -          | -       | -        | -    | -        | -       | 48.9 | -        | -    |
| NRNIF-ISGKAA | -          | -       | -        | -    | -        | -       | 7.4  | -        | -    |
| NRNIF-ISGEAA | -          | -       | -        | -    | -        | -       | 27.7 | -        | -    |
| NRNLS-ISGEGA | 2.9        | 0.5     | 2.3      | -    | 0.1      | -       | -    | -        | -    |
| NRNLS-IAGEAA | 5.9        | 10.2    | 1.2      | -    | -        | -       | -    | 20.0     | -    |
| ICNIS-ISAKAA | -          | -       | -        | -    | -        | -       | -    | 6.7      | -    |
| ICNIS-ISGKAA | -          | -       | -        | -    | -        | -       | -    | -        | -    |
| ICNIS-ISGEAA | -          | -       | -        | -    | -        | -       | -    | -        | -    |
| ICNIS-ISGEGA | -          | -       | -        | -    | -        | -       | -    | -        | 17.6 |
| IRNIS-ISAKAA | -          | -       | -        | 21.6 | 4.9      | 14.7    | -    | -        | -    |
| IRNIS-ISGKAA | 5.9        | -       | -        | 16.5 | 4.5      | 9.3     | -    | -        | -    |
| IRNIS-ISGKGA | -          | -       | 0.4      | -    | 0.6      | 1.3     | -    | -        | -    |
| IRNIS-ISGNGA | -          | 1.9     | 0.4      | 2.1  | 8.3      | 6.0     | -    | -        | -    |
| IRNIS-ISGEAA | 2.9        | 2.8     | 0.3      | 6.2  | 4.4      | 9.3     | -    | -        | -    |
| IRNIS-ISGEGA | -          | 6.0     | 6.7      | 1.0  | 1.0      | 3.3     | -    | -        | -    |
| IRNIS-IAAKAA | -          | -       | -        | -    | 0.8      | 2.0     | -    | -        | -    |
| IRNIS-IAGKAA | -          | -       | -        | 7.2  | 5.6      | 22.0    | -    | -        | -    |
| IRNIS-IAGKAS | -          | -       | -        | -    | -        | -       | -    | -        | -    |
| IRNIS-IAGEAA | 20.6       | 4.7     | 5.0      | 3.1  | 15.6     | 3.3     | -    | -        | -    |
| IRNIS-VAGKAA | -          | -       | -        | -    | -        | -       | -    | -        | -    |
| IRNIS-VAGKGS | -          | -       | -        | -    | -        | -       | -    | -        | -    |
| IRNLS-ISGNGA | -          | 2.8     | 6.0      | -    | 30.7     | 0.7     | -    | -        | -    |
| IRNLS-ISGEAA | 2.9        | 0.5     | 1.2      | -    | 2.0      | 0.7     | -    | -        | -    |
| IRNLS-ISGEGA | 5.9        | 34.0    | 60.8     | -    | 1.8      | -       | -    | -        | -    |
| IRNLS-IFGKAA | -          | -       | -        | -    | -        | -       | -    | -        | -    |
| IRNLS-IFGEAS | -          | -       | -        | -    | 0.3      | 16.0    | -    | -        | -    |
| IRNLS-IAGEAA | 14.7       | 25.1    | 9.5      | -    | 10.0     | 2.7     | -    | -        | -    |
