# Supplementary material for: Genetic diversity of the Plasmodium falciparum GTP-cyclohydrolase 1, dihydrofolate reductase and dihydropteroate synthetase genes reveals new insights into sulfadoxine-pyrimethamine antimalarial drug resistance
Source: PubMed Central journal article supplement (PMC7774857; doi:10.1371/journal.pgen.1009268), 2020-12-31
Supplement: pgen.1009268.s006.pdf [file pgen.1009268.s006.pdf]

**S3 Table. Frequency (%) of *pfgch1* amplifications (DupA-J) by country.**

| Country      | Region | n   | A   | B   | C   | D           | E           | F *         | G **        | H *** | I +         | I ++        | I +++       | J   |
|--------------|--------|-----|-----|-----|-----|-------------|-------------|-------------|-------------|-------|-------------|-------------|-------------|-----|
| Mauritania   | WAfr   | 55  | -   | -   | -   | -           | -           | -           | -           | -     | 1.8         | 1.8         | <b>10.9</b> | -   |
| Mali         | WAfr   | 258 | -   | -   | -   | -           | -           | -           | -           | 0.4   | 5.4         | 2.3         | 4.3         | -   |
| Senegal      | WAfr   | 76  | -   | -   | -   | -           | -           | -           | -           | -     | 6.6         | 6.6         | -           | -   |
| Gambia       | WAfr   | 167 | -   | -   | -   | -           | -           | -           | -           | 0.6   | 4.8         | 3.0         | 0.6         | -   |
| Guinea       | WAfr   | 99  | -   | -   | -   | -           | -           | -           | -           | -     | <b>10.1</b> | <b>16.2</b> | 5.1         | -   |
| Burkina Faso | WAfr   | 11  | -   | -   | -   | -           | -           | -           | -           | -     | -           | -           | -           | -   |
| Ivory Coast  | WAfr   | 46  | -   | -   | -   | -           | -           | -           | 2.2         | 4.3   | 2.2         | 4.3         | <b>10.9</b> | -   |
| Ghana        | WAfr   | 468 | -   | -   | -   | -           | 0.9         | 0.6         | 1.7         | 0.6   | 3.0         | 3.8         | <b>18.4</b> | 0.2 |
| Benin        | WAfr   | 61  | -   | -   | -   | -           | -           | -           | -           | -     | 1.6         | 1.6         | 4.9         | -   |
| Nigeria      | WAfr   | 13  | -   | -   | -   | -           | -           | -           | -           | -     | <b>15.4</b> | -           | <b>30.8</b> | -   |
| Cameroon     | CAfr   | 158 | -   | -   | -   | -           | 2.5         | -           | -           | 7.6   | 6.3         | 3.8         | 1.3         | -   |
| DRC          | CAfr   | 179 | -   | -   | -   | -           | 1.1         | -           | -           | -     | <b>10.1</b> | <b>19.0</b> | 0.6         | -   |
| Uganda       | E Afr  | 4   | -   | -   | -   | -           | -           | -           | -           | -     | <b>25.0</b> | <b>25.0</b> | -           | -   |
| Kenya        | E Afr  | 50  | -   | -   | 6.0 | -           | -           | -           | -           | -     | <b>46.0</b> | <b>20.0</b> | 2.0         | -   |
| Tanzania     | E Afr  | 216 | -   | -   | -   | -           | -           | -           | -           | -     | <b>46.8</b> | <b>18.1</b> | -           | -   |
| Malawi       | SAfr   | 215 | -   | -   | -   | -           | -           | -           | -           | -     | <b>64.2</b> | <b>29.3</b> | -           | -   |
| Madagascar   | SAfr   | 18  | -   | -   | -   | <b>11.1</b> | -           | -           | -           | -     | -           | -           | -           | -   |
| Ethiopia     | HoAfr  | 22  | -   | 9.1 | -   | -           | -           | -           | -           | -     | -           | -           | -           | -   |
| Bangladesh   | SEA    | 34  | -   | -   | -   | -           | 2.9         | <b>17.6</b> | -           | -     | -           | -           | -           | -   |
| Myanmar      | SEA    | 215 | -   | -   | -   | -           | <b>17.2</b> | <b>14.0</b> | 3.3         | 0.5   | -           | -           | -           | -   |
| Thailand     | SEA    | 684 | -   | -   | -   | -           | <b>27.6</b> | 9.1         | 2.2         | -     | -           | -           | -           | -   |
| Laos         | SEA    | 97  | -   | -   | -   | -           | -           | -           | 1.0         | -     | -           | -           | -           | -   |
| Cambodia     | SEA    | 710 | 0.4 | -   | 0.3 | -           | 7.2         | -           | 2.7         | -     | -           | -           | -           | -   |
| Vietnam      | SEA    | 150 | -   | -   | -   | -           | 0.7         | -           | <b>11.3</b> | -     | -           | -           | -           | -   |

\* GB4, T996; \*\* KH02; \*\*\* NF54; + KE01; ++ KE01/ML01; +++ ML01; DRC = Democratic Republic of Congo; PNG = Papua New Guinea; gDupA - H are gene amplifications; pDupI (3 types) and pDupJ are promoter amplifications; omitted are Mozambique (n=1; J type) and Indonesia (n=1, no amplification); Papua New Guinea (N=94), Colombia (N=15) and Peru (N=17) have no amplifications; WAfr West Africa; CAfr Central Africa; EAfr East Africa; SAfr Southern Africa; HoAfr Horn of Africa; SEA South(east) Asia; frequencies greater than 10% are bolded
