# Supplementary material for: Genetic diversity of the Plasmodium falciparum GTP-cyclohydrolase 1, dihydrofolate reductase and dihydropteroate synthetase genes reveals new insights into sulfadoxine-pyrimethamine antimalarial drug resistance
Source: PubMed Central journal article supplement (PMC7774857; doi:10.1371/journal.pgen.1009268), 2020-12-31
Supplement: pgen.1009268.s007.pdf [file pgen.1009268.s007.pdf]

S4 Table. The main *pfgch1* amplifications with the most frequent *pfdhfr*/*pfdhps* genotypes in Africa and Asia (%).

| Duplication | N   | Genotypes *         | Number of genotypes | West Africa | Central Africa | East Africa | Southern Africa | Horn of Africa | Southeast Asia |
|-------------|-----|---------------------|---------------------|-------------|----------------|-------------|-----------------|----------------|----------------|
| A           | 3   | NCSIS-ISAKAA        | 3                   | -           | -              | -           | -               | -              | <b>100</b>     |
| B           | 2   | <b>IRNIS-ISGEAA</b> | 2                   | -           | -              | -           | -               | <b>100</b>     | -              |
| C           | 5   | <b>IRNIS-ISGKAA</b> | 2                   | -           | -              | -           | -               | -              | <b>40</b>      |
|             |     | <b>IRNLS-IFGKAA</b> | 3                   | -           | -              | <b>60</b>   | -               | -              | -              |
| D           | 2   | <b>IRNIS-ISGKGA</b> | 2                   | -           | -              | -           | <b>100</b>      | -              | -              |
| E           | 289 | <b>IRNIS-ISGEAA</b> | 20                  | -           | -              | -           | -               | -              | 6.9            |
|             |     | <b>IRNIS-IAGEAA</b> | 36                  | -           | -              | -           | -               | -              | <b>12.5</b>    |
|             |     | <b>IRNLS-ISGNGA</b> | 16                  | -           | -              | -           | -               | -              | 5.5            |
|             |     | <b>IRNLS-ISGEAA</b> | 124                 | -           | -              | -           | -               | -              | <b>42.9</b>    |
|             |     | <b>IRNLS-IAGEAA</b> | 45                  | -           | -              | -           | -               | -              | <b>15.6</b>    |
| F *         | 101 | <b>NRNIS-IAGEAA</b> | 7                   | -           | -              | -           | -               | -              | 6.9            |
|             |     | <b>IRNIS-ISGEAA</b> | 10                  | -           | -              | -           | -               | -              | 9.9            |
|             |     | <b>IRNLS-ISGEAA</b> | 49                  | -           | -              | -           | -               | -              | <b>48.5</b>    |
|             |     | <b>IRNLS-IAGEAA</b> | 11                  | -           | -              | -           | -               | -              | <b>10.9</b>    |
| G **        | 68  | <b>IRNIS-ISGKAA</b> | 5                   | 4.4         | -              | -           | -               | -              | 2.9            |
|             |     | <b>IRNLS-ISGNGA</b> | 16                  | -           | -              | -           | -               | -              | <b>23.5</b>    |
|             |     | <b>IRNLS-ISGEAA</b> | 13                  | -           | -              | -           | -               | -              | <b>19.1</b>    |
|             |     | <b>IRNLS-IFGEAS</b> | 17                  | -           | -              | -           | -               | -              | <b>25.0</b>    |
| H ***       | 20  | <b>IRNIS-ISGKAA</b> | 10                  | <b>15.0</b> | <b>35.0</b>    | -           | -               | -              | -              |
|             |     | <b>IRNIS-VAGKAA</b> | 2                   | -           | <b>10.0</b>    | -           | -               | -              | -              |
|             |     | <b>IRNIS-VAGKGS</b> | 3                   | <b>10.0</b> | 5.0            | -           | -               | -              | -              |
| I +         | 347 | <b>IRNIS-ISGKAA</b> | 43                  | 7.8         | 4.6            | -           | -               | -              | -              |
|             |     | <b>IRNIS-ISGEAA</b> | 214                 | -           | -              | <b>23.1</b> | <b>38.6</b>     | -              | -              |
|             |     | <b>IRNIS-ISGEAA</b> | 30                  | -           | 0.3            | 8.1         | 0.3             | -              | -              |
| I ++        | 207 | <b>IRNIS-ISGKAA</b> | 46                  | 8.2         | <b>14.0</b>    | -           | -               | -              | -              |
|             |     | <b>IRNIS-ISGEAA</b> | 88                  | 0.5         | -              | <b>12.6</b> | <b>29.5</b>     | -              | -              |
|             |     | <b>IRNIS-ISGEAA</b> | 18                  | -           | 0.5            | 8.2         | -               | -              | -              |
|             |     | <b>IRNIS-IAGKAA</b> | 18                  | 7.2         | 1.4            | -           | -               | -              | -              |
| I +++       | 125 | <b>NCSIS-ISGKAA</b> | 8                   | 6.4         | -              | -           | -               | -              | -              |
|             |     | <b>IRNIS-ISGKAA</b> | 39                  | <b>30.4</b> | 0.8            | -           | -               | -              | -              |
|             |     | <b>IRNIS-IAAKAA</b> | 7                   | 5.6         | -              | -           | -               | -              | -              |
|             |     | <b>IRNIS-IAGKAA</b> | 32                  | <b>24.8</b> | 0.8            | -           | -               | -              | -              |
|             |     | <b>IRNIS-IAGKAS</b> | 9                   | 7.2         | -              | -           | -               | -              | -              |

\* GB4, T996; \*\* KH02; \*\*\* NF54; + KE01; ++ KE01/ML01; +++ ML01; gDupA - H are gene amplifications; pDupI (3 types) and pDupJ are promoter amplifications; \* based on *pfdhfr* (N51I, C59R, S108N, I164L and I306F) and *pfdhps* (I431V, S436A, A437G, K540E/K540N, A581G and A613S); frequencies of at least 10% are bolded
